# Supplementary material
Source: PubMed Central journal article supplement (PMC4198041)
Supplement: embr0015-0973-sd2.pdf [file embr0015-0973-sd2.pdf]

## Supplementary Methods

### *C. elegans* Strains

Strains of *C. elegans* were cultured at 20°C using standard protocols. The N2 Bristol strain was used as the wild-type strain. The following strains were used in this work: linkage group I (LG I): *mtm-1(ok742)*, *vps-34(h797)*, *epg-8(bp251)*; LG II: *laat-1(qx42)*, *lgg-1(bp500)*, *epg-5(tm3425)*; LG III: *mtm-3(tm4475)*, *cup-5(bp510)*, *epg-6(bp242)*, *mtm-6(ok330)*; LG V: *atg-9(bp564)*, *mtm-9(ok3523)*, *atg-18(gk378)*; LG X: *mtm-5(ok469)*, *atg-2(bp576)*.

The *vps-34*-deficient strain, *vps-34(h797)*, is maintained as *dpy-5(e61) vps-34(h797); qxEx [vps-34(+); P<sub>sur-5</sub>SUR-5-GFP]*. Non-green embryos were scored as *vps-34(lf) (dpy-5(e61) vps-34(h797))*. The *tm4475* allele of *mtm-3* contains a 402 bp deletion and 12 bp insertion that removes the entire 3<sup>rd</sup> exon and intron and generates an early stop codon, resulting in a truncated protein containing only the first 66 amino acids. It is probably a null mutation of *mtm-3* and has been out-crossed with the wild type N2 strain at least 6 times before further analysis. The *mtm-3(tm4475)* mutants are viable but display a 36% embryonic lethality and 45% larval arrest. The *ok742* allele of *mtm-1* contains a 1314 bp deletion that removes the region from intron 4 to exon 7 of the *mtm-1* gene, resulting in a truncated MTM-1 protein containing only the N-terminal PH-GRAM domain. It is likely a null mutation of *mtm-1* which causes embryonic lethality and larval arrest. The deletion alleles of *mtm-6* and *mtm-9*, *ok330* and *ok3523*, cause protein truncations that remove the majority of the catalytic phosphatase domain of MTM-6 and 9, and are therefore very likely to be strong loss-of-function or null mutations. The *ok469* allele of *mtm-5* contains a 665 bp deletion that removes the region from

exon 7 to 9, resulting in a truncated MTM-5 protein lacking the conserved myotubularin domain.

*adIs2122* ( $P_{lgg-1}$ -GFP::LGG-1) was a gift from C. Kang (University of Texas). Other strains carrying integrated or transgenic arrays used in this study are as follows:

*qxIs293*( $P_{mtm-3}$ -GFP::MTM-3), *qxIs503*[ $P_{mtm-3}$ -GFP::MTM-3(C459S)],

*qxEx4098*( $P_{ced-1}$ -ATG-18::GFP), *qxEx5931*[ $P_{ced-1}$ -ATG-18(FKKG)::GFP],

*qxEx5932*[ $P_{ced-1}$ -ATG-18(FTTG)::GFP], *bpIs151*( $P_{sqst-1}$ -SQST-1::GFP),

*bpIs242*(C33D9.6::GFP) and *bpIs244*(C17E4.2::GFP), *arIs37*( $P_{myo-3}$ -ssGFP), *bIs1*

(VIT-2::GFP).

### **Starvation assay**

Embryos were synchronized, collected and incubated in deionized distilled water at 20 °C. At each time point, an aliquot of each sample was placed on an OP50-seeded plate. After 3 days at 20°C, the number of animals surviving to L4 or adulthood was counted. At least 300 animals were quantified each day.

### **RNAi**

To inactivate *vps-34*, *mtm-3*, *atg-18*, *rab-5* and *rab-7* by RNAi, dsRNA (corresponding to bases 560 to 1390 of the *vps-34* cDNA, 1151 to 1774 of the *mtm-3* cDNA, 340 to 818 of the *atg-18* cDNA, 32 to 590 of the *rab-5* cDNA, and 147 to 609 of the *rab-7* cDNA) was synthesized in vitro (~1000 ng/μl) and injected into the gonad of young adult hermaphrodites.

The phenotype of embryos laid between 12 to 24 h post-injection was examined.

### **Examination of expression levels of GFP::MTM-3 and ATG-18::GFP**

To determine expression levels of GFP::MTM-3 and ATG-18::GFP, mixed-stage worms that express GFP::MTM-3, GFP::MTM-3(C459S) or ATG-18::GFP were collected and worm lysates were prepared for western blot analysis using anti-GFP antibody. Tubulin was used as the internal control.

### **Microscopy and imaging analysis**

DIC and fluorescent images were captured with a Zeiss Axioimager A1 equipped with epifluorescence and an AxioCam monochrome digital camera and were processed and viewed using Axiovision Rel. 4.7 software (Carl Zeiss, Inc.). For confocal images, a Zeiss LSM 510 Pascal inverted confocal microscope with 488 and 543 lasers and a Zeiss LSM 510 Meta inverted confocal microscope with 405, 488 and 543 lasers were used and images were processed and viewed using LSM Image Browser software.

### **Transmission Electron Microscopy (TEM)**

Embryos were treated with chitinase [20 mg/ml chitinase, 130 mM KCl, 2.5 mM MgCl<sub>2</sub>, 2.5 mM CaCl<sub>2</sub>, 5 mM HEPES (pH 7.5)] for 5 min and then fixed in 2.5% glutaraldehyde, 1% paraformaldehyde in 0.1 M sucrose on ice followed by fixing for 90 min at 4°C in M9 containing 0.5% OsO<sub>4</sub> and 0.5% KFe(CN)<sub>6</sub>. Each worm was embedded in a small block of 3% agarose. After dehydration with graded ethanol solutions, worms were embedded in EMBED812 (Electron Microscopy Sciences). 70-nm ultrathin sections were stained with 2%

uranyl acetate for 30 min and lead citrate for 10 min.

### **Plasmid construction**

To generate the GFP::MTM-3 reporter, a 2.5 kb promoter region of *mtm-3* was inserted into the pPD49.26-gfp vector via the Bam HI site, followed by ligation with the 2.9 kb *mtm-3* cDNA through the KpnI site. To obtain the ATG-18::GFP reporter, 2.1 kb of *atg-18* genomic DNA was cloned into  $P_{ced-1}$ -gfp through the Kpn I site. The C459S mutation of MTM-3 and the FKKG/FTTG mutations of ATG-18 were introduced into the above constructs using PCR-based site-directed mutagenesis.
